# Supplementary material
Source: PubMed Central journal article supplement (PMC4918631)
Supplement: NIHMS794648-supplement-Supporting_Information.pdf [file NIHMS794648-supplement-Supporting_Information.pdf]

## Supporting Information

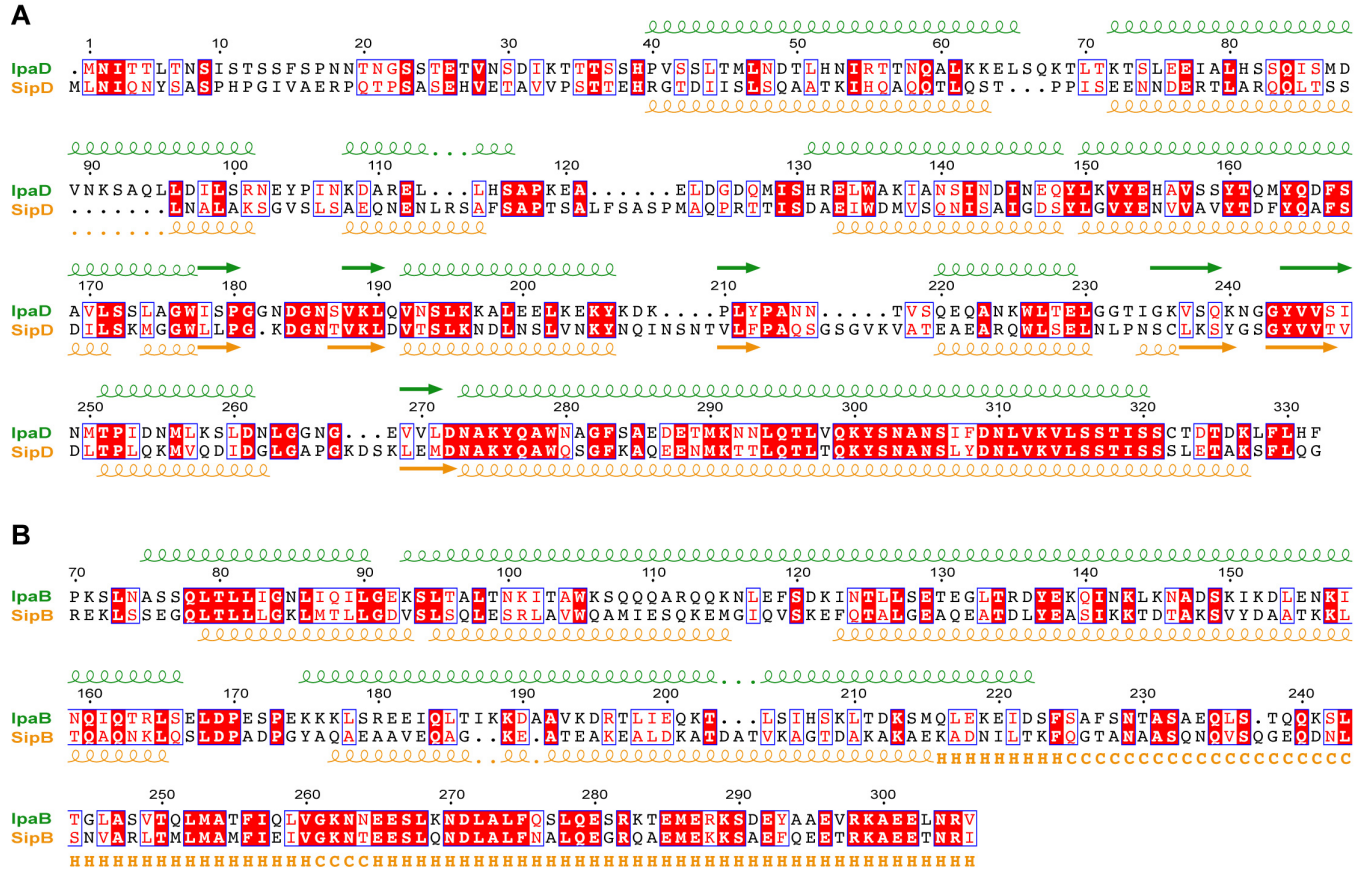

**Figure S1. Sequence alignment of tip and translocon proteins from *Shigella* and *Salmonella* T3SS.** Sequence alignment of (A) tip proteins IpaD and SipD and (B) N-terminal ectodomain of major translocon proteins IpaB and SipB from *Shigella* and *Salmonella* T3SS, respectively. Numbers above the sequences correspond to *Shigella flexneri* proteins. Secondary structure elements are shown above and below the alignment and color-coded by its corresponding protein. (Legend:  $\beta$ -strands, arrows; predicted helices, H; predicted coils, C). Alignment was generated using Clustal Omega and rendered with ESPrnt (Robert and P. Gouet, *Nucl. Acids Res* **2014**, 42 (W1): W320-W324).

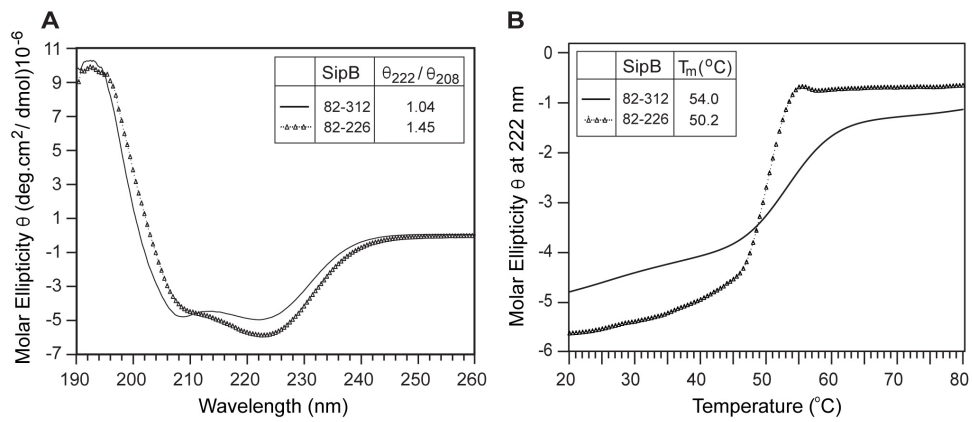

**Figure S2. Circular Dichroism and thermal denaturation spectra of SipB constructs.** (A) CD spectra for SipB<sup>82-312</sup> and SipB<sup>82-226</sup> shows predominantly  $\alpha$ -helical protein. (B) Thermal denaturation curves at 222 nm show a  $T_m$  of 54 °C and 50.2 °C, for SipB<sup>82-312</sup> and SipB<sup>82-226</sup>, respectively.

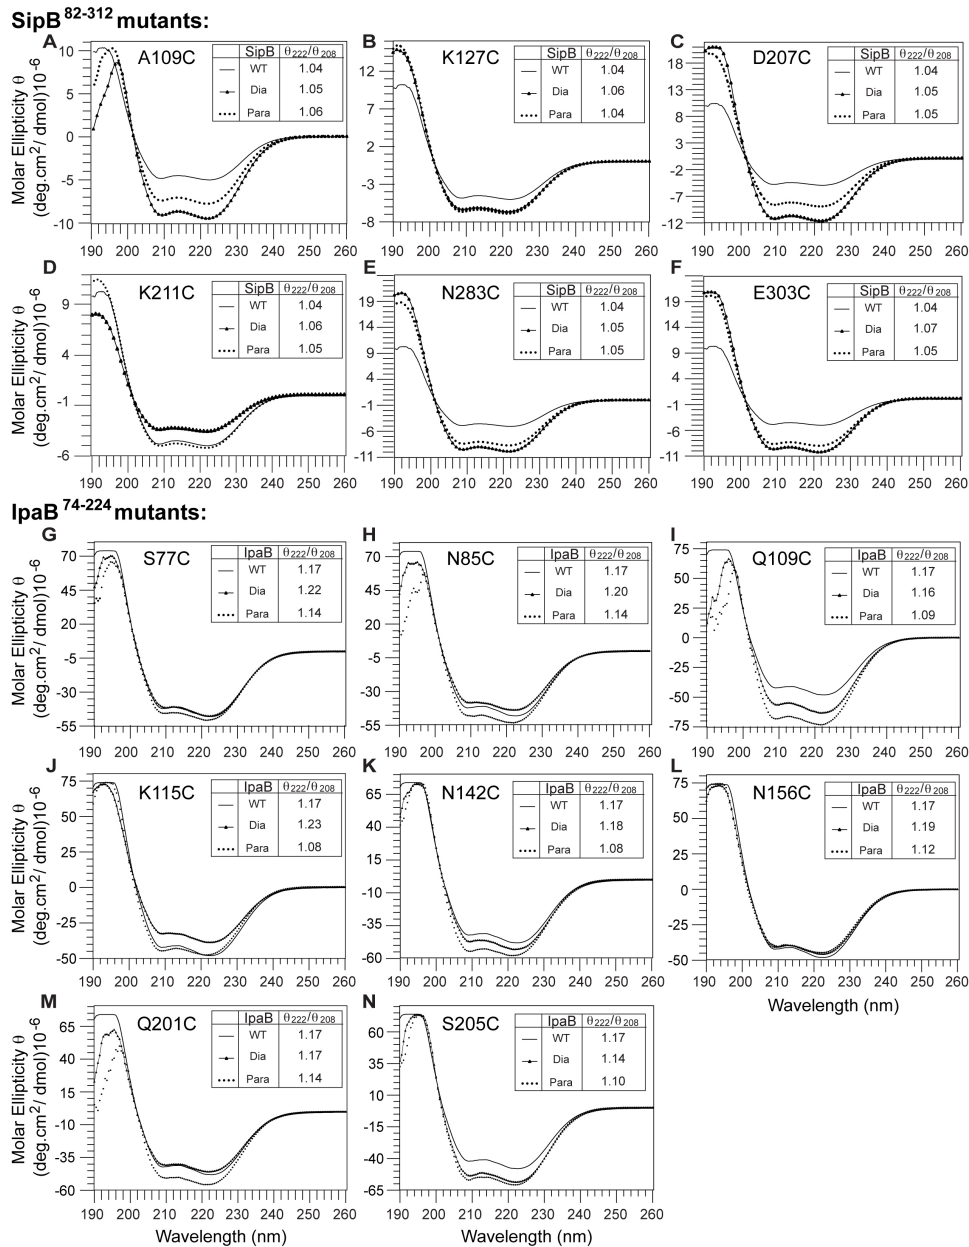

**Figure S3. CD spectroscopy of SipB<sup>82-312</sup> and IpaB<sup>74-224</sup> cysteine mutants used in the PRE studies.** (A-F) The CD spectrum of wild type SipB (WT) compared to cysteine point mutants before and after the attachment of the MTSL spin label. (G-N) The CD spectrum of wild type IpaB (WT) compared with cysteine point mutants before and after attachment of the MTSL spin label. (Legend: dia, diamagnetic; para, paramagnetic).

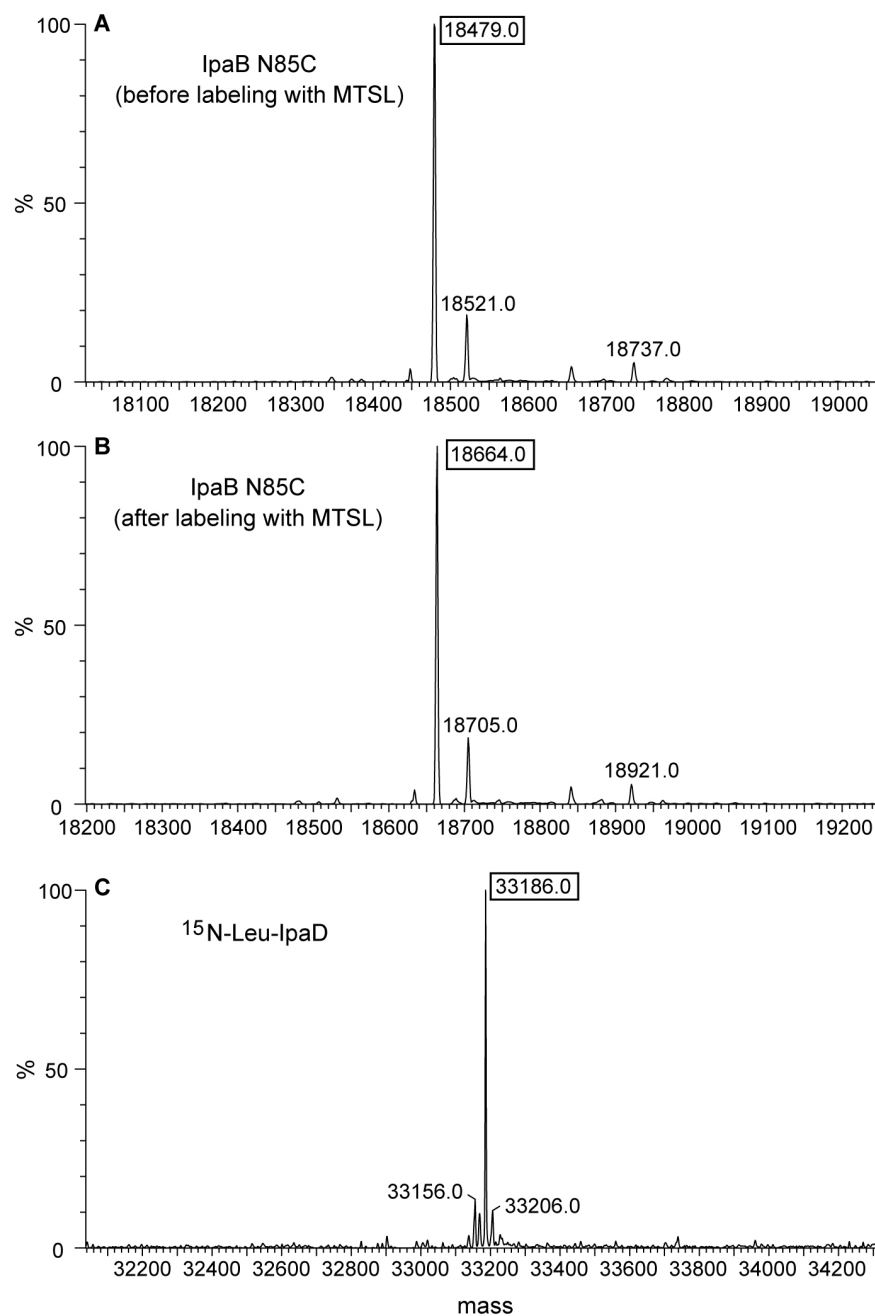

**Figure S4. Representative electrospray ionization mass spectrometry (ESI-MS) on IpaB and IpaD to confirm extent of labeling.** ESI-MS on IpaB N85C mutant (**A**) before MTSL-labeling (theoretical mass, 18479 Da), and (**B**) after MTSL labeling (theoretical mass, 18664). MTSL conjugation resulted in an expected increase in mass of 185 Da. (**C**) ESI-MS of <sup>15</sup>N-Leu labeled IpaD (theoretical mass, 33186).

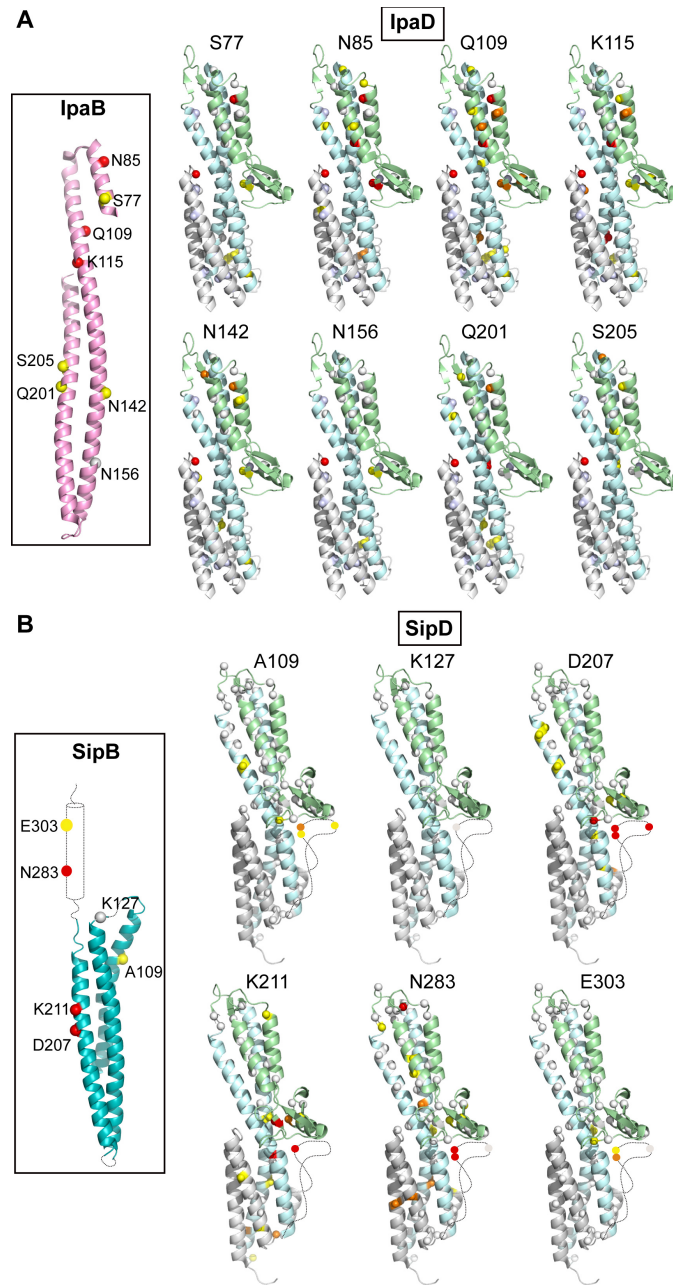

**Figure S5. PRE effect produced by different spin labels in *Shigella* IpaD-IpaB and *Salmonella* SipD-SipB interaction.** (A) Results of *Shigella* PRE experiments with spin-labeled IpaB mapped on the structure of IpaD. (B) Results of *Salmonella* PRE experiments with spin-labeled SipB mapped onto the structure of SipD. Color scheme is followed from Figure 4 and Figure 5.
